# Supplementary material for: Unprecedented flexibility of the 1,1′-bis(o-carborane) ligand: catalytically-active species stabilised by B-agostic B–H⇀Ru interactions
Source: Royal Society of Chemistry journal article supplement (doi:10.1039/c5dt03417e), 2015-11-17
Supplement: c5dt03417e1.pdf [file c5dt03417e1.pdf]

## Unprecedented flexibility of the 1,1'-bis(*o*-carborane) ligand: catalytically-active species stabilised by B-agostic B–H→Ru interactions

Laura E. Riley, Antony P. Y. Chan, James Taylor, Wing Y. Man, David Ellis, Georgina M. Rosair, Alan J. Welch and Igor B. Sivaev

### Electronic Supporting Information

#### S1. NMR study of compound **4**

Compounds **3** and **4** are fully analogous and have very similar NMR spectra. The signal for the agostic *BH* appears as two peaks in the  $^1\text{H}\{^{11}\text{B}\}$  NMR spectrum, and this could be interpreted in two different ways: a doublet arising from coupling to one P atom or two singlets arising from two isomers of these compounds, one with C2' on the opposite side of the molecule from the agostic *BH* and the other with C2' on the same side.

We initially believed that the second interpretation was correct, since;

- The  $^{31}\text{P}$  NMR spectrum of **4** was effectively identical to the  $^{31}\text{P}\{^1\text{H}\}$  spectrum.
- Both  $^1\text{H}/^{31}\text{P}\{^1\text{H}\}$  HMBC and HMQC spectra of **4** revealed no evidence of coupling between the agostic *BH* and either P atom.

However, conclusive evidence that the first interpretation (the agostic *BH* resonance is a doublet arising from  $^{31}\text{P}$  coupling) is correct was provided by  $^1\text{H}\{^{11}\text{B}, ^{31}\text{P}\}$  NMR spectroscopy on compound **4**:

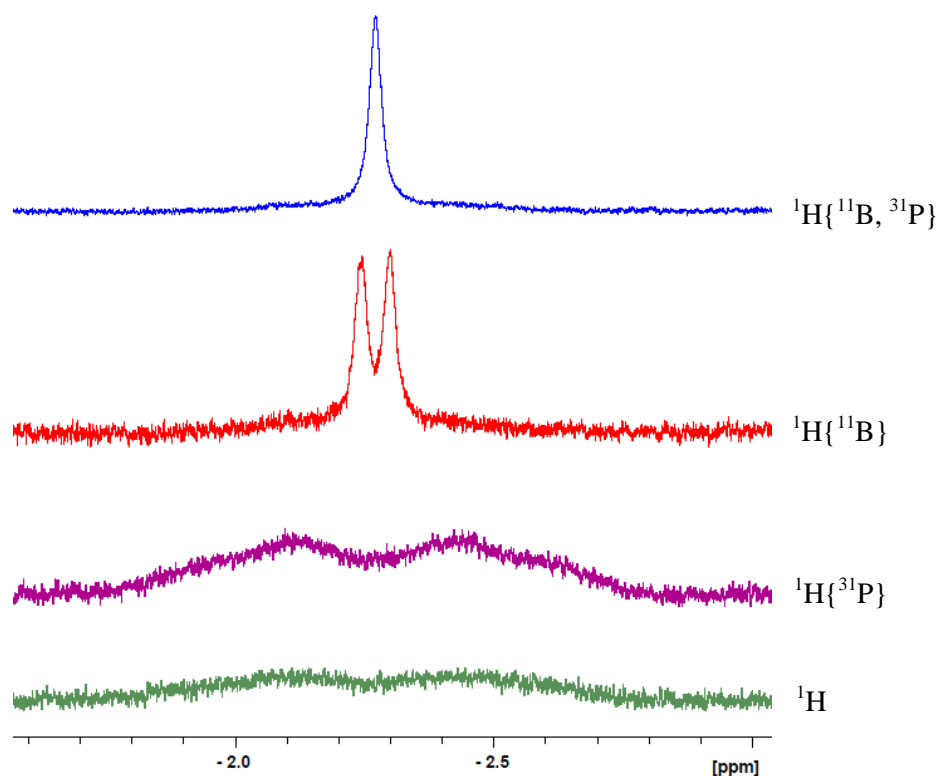

S2.

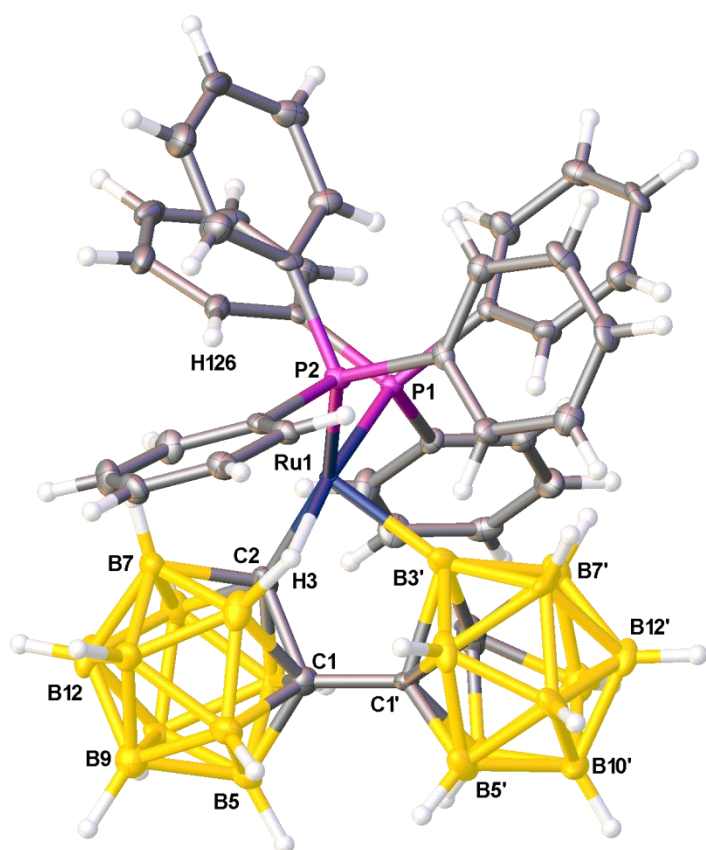

Perspective view of compound **3** and part of the atom numbering scheme. Only the major component of the partial disorder is shown. Selected interatomic distances (Å): Ru1–C2 2.131(6), Ru1–B3' 2.108(7), Ru1–H3 1.79(6), Ru1–B3 2.422(7), B3–H3 1.14(6), Ru1–P1 2.2901(13), Ru1–P2 2.4480(13), C1–C1' 1.526(7).

S3. The two isomers of compound 5

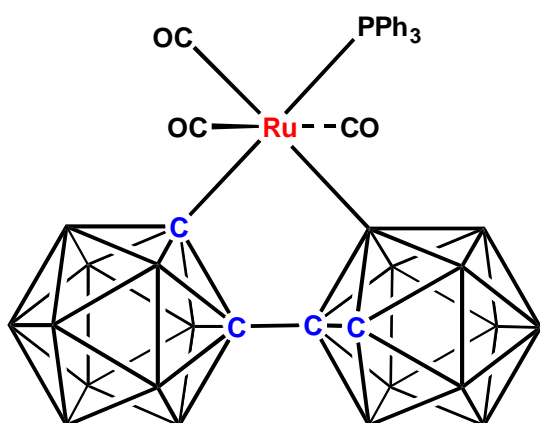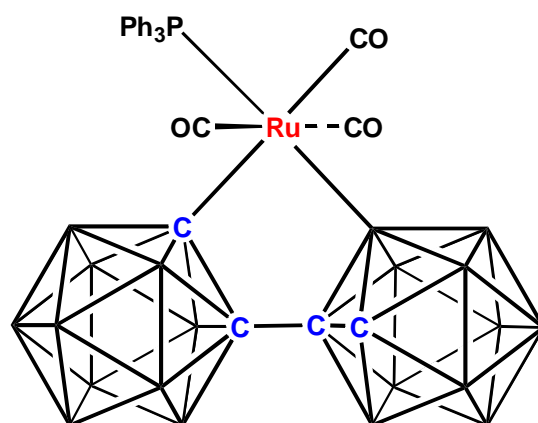

**S4.**

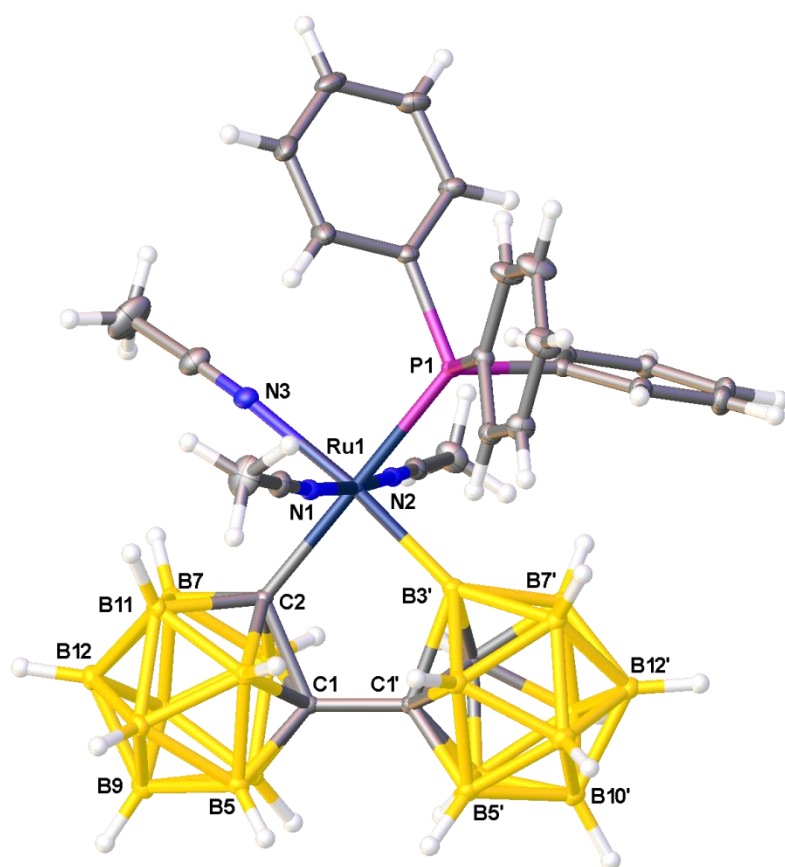

Perspective view of compound **6** and part of the atom numbering scheme. Selected interatomic distances (Å) and angles (°): Ru1–C2 2.1645(13), Ru1–B3' 2.1019(16), Ru1–P1 2.3769(5), Ru1–N1 2.0191(13), Ru1–N2 2.0211(13), Ru1–N3 2.1769(13), C1–C1' 1.5351(19), Ru1–N1–C11 174.25(12), Ru1–N2–C21 177.43(11), Ru1–N3–C31 160.66(13).

S5.

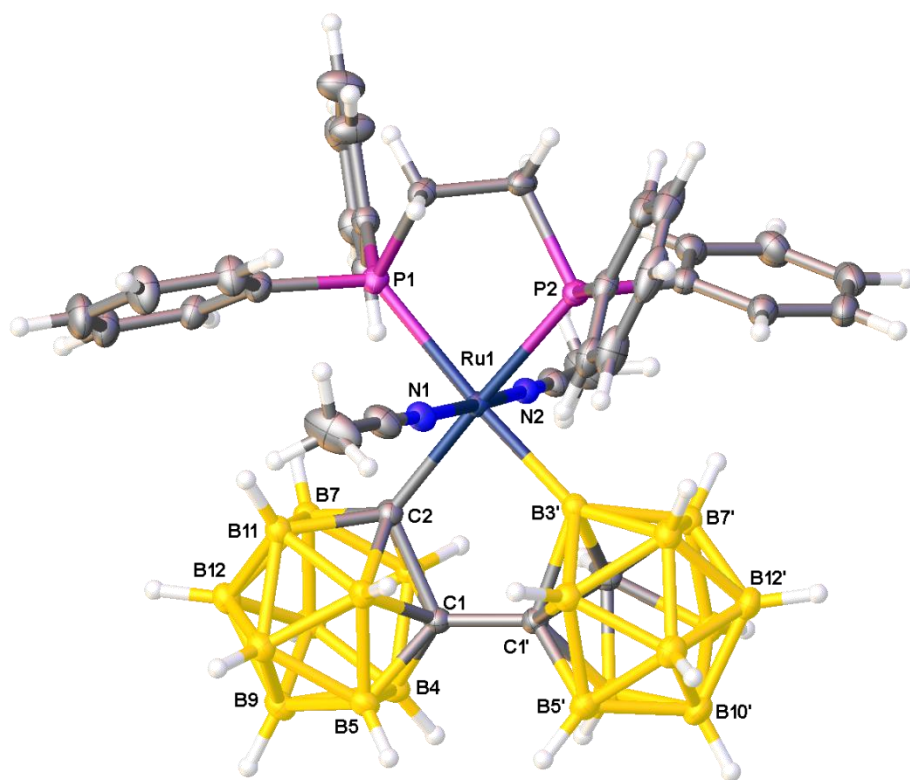

Perspective view of compound **8** and part of the atom numbering scheme. Selected interatomic distances (Å) and angles (°): Ru1–C2 2.1716(18), Ru1–B3' 2.143(2), Ru1–P1 2.4256(5), Ru1–P2 2.3473(5), Ru1–N1 2.0188(17), Ru1–N2 1.9943(17), C1–C1' 1.524(3), Ru1–N1–C11 174.30(18), Ru1–N2–C21 179.52(18).
